# Supplementary material for: Effect of morphological variation in three-dimensional multiwall carbon nanotubes as the host cathode material for high-performance rechargeable lithium–sulfur batteries
Source: Royal Society of Chemistry journal article supplement (doi:10.1039/d3ra00502j), 2023-01-01
Supplement: d3ra00502j1.pdf [file d3ra00502j1.pdf]

## Supplementary Information

### **Effect of Morphological Variation in Three-Dimensional Multiwall Carbon Nanotubes as Host Cathode Material for High-Performance Rechargeable Lithium-Sulfur Batteries**

Pashupati R. Adhikari<sup>a</sup>, Eunji Lee<sup>c</sup>, Lee Smith<sup>a</sup>, Jeongyong Kim<sup>c</sup>, Sheldon Shi<sup>a</sup>, Wonbong Choi<sup>a, b, \*</sup>

<sup>a</sup>Department of Mechanical Engineering, University of North Texas, Denton, TX 76207, USA

<sup>b</sup>Department of Material Science and Engineering, University of North Texas, Denton, TX 76207, USA

<sup>c</sup>Department of Energy Science, Sungkyunkwan University, Suwon 16419, Republic of Korea

\* Corresponding Author: Department of Mechanical Engineering, University of North Texas, Discovery Park, 3940 North Elm St., Denton, TX 76207, USA.

E-mail: [wonbong.choi@unt.edu](mailto:wonbong.choi@unt.edu)

**Table S1.** The deposition rate and total thicknesses of Titanium (Ti) and Nickel (Ni) on Cu-mesh used for 3D CNTs synthesis.

| Ti-time (min) | Ni-time (min) | Ti-deposition rate (nm/min) | Ni-deposition rate (nm/min) | Ti-thickness (nm) | Ni-thickness (nm) |
|---------------|---------------|-----------------------------|-----------------------------|-------------------|-------------------|
| 8             | 6             | 3.75                        | 5                           | 30                | 30                |
| 8             | 8             | 3.75                        | 5                           | 30                | 40                |
| 8             | 10            | 3.75                        | 5                           | 30                | 50                |
| 8             | 12            | 3.75                        | 5                           | 30                | 60                |

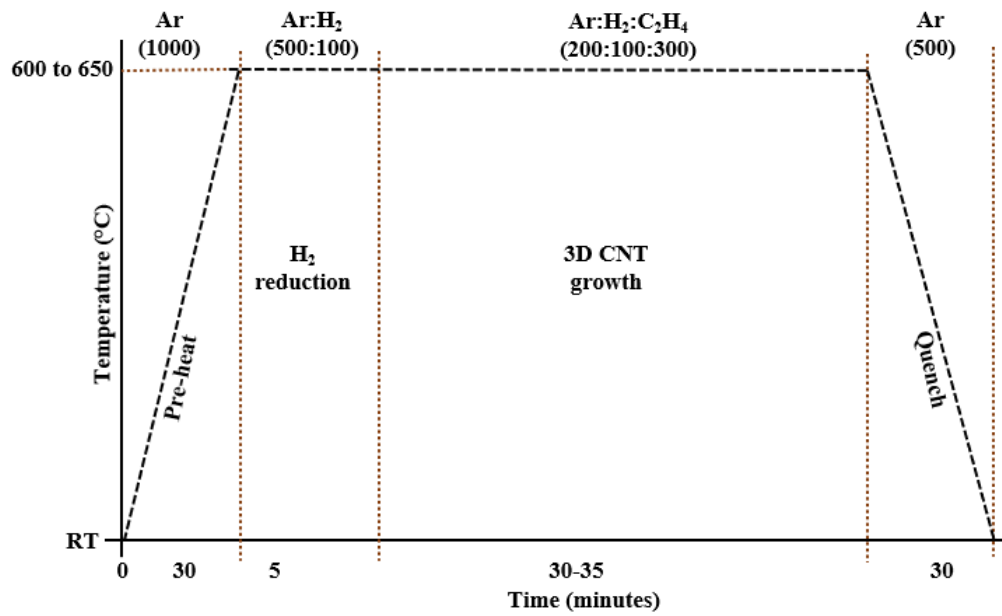

**Figure S1.** A schematic showing the steps involved in the complete 3D CNTs synthesis process.

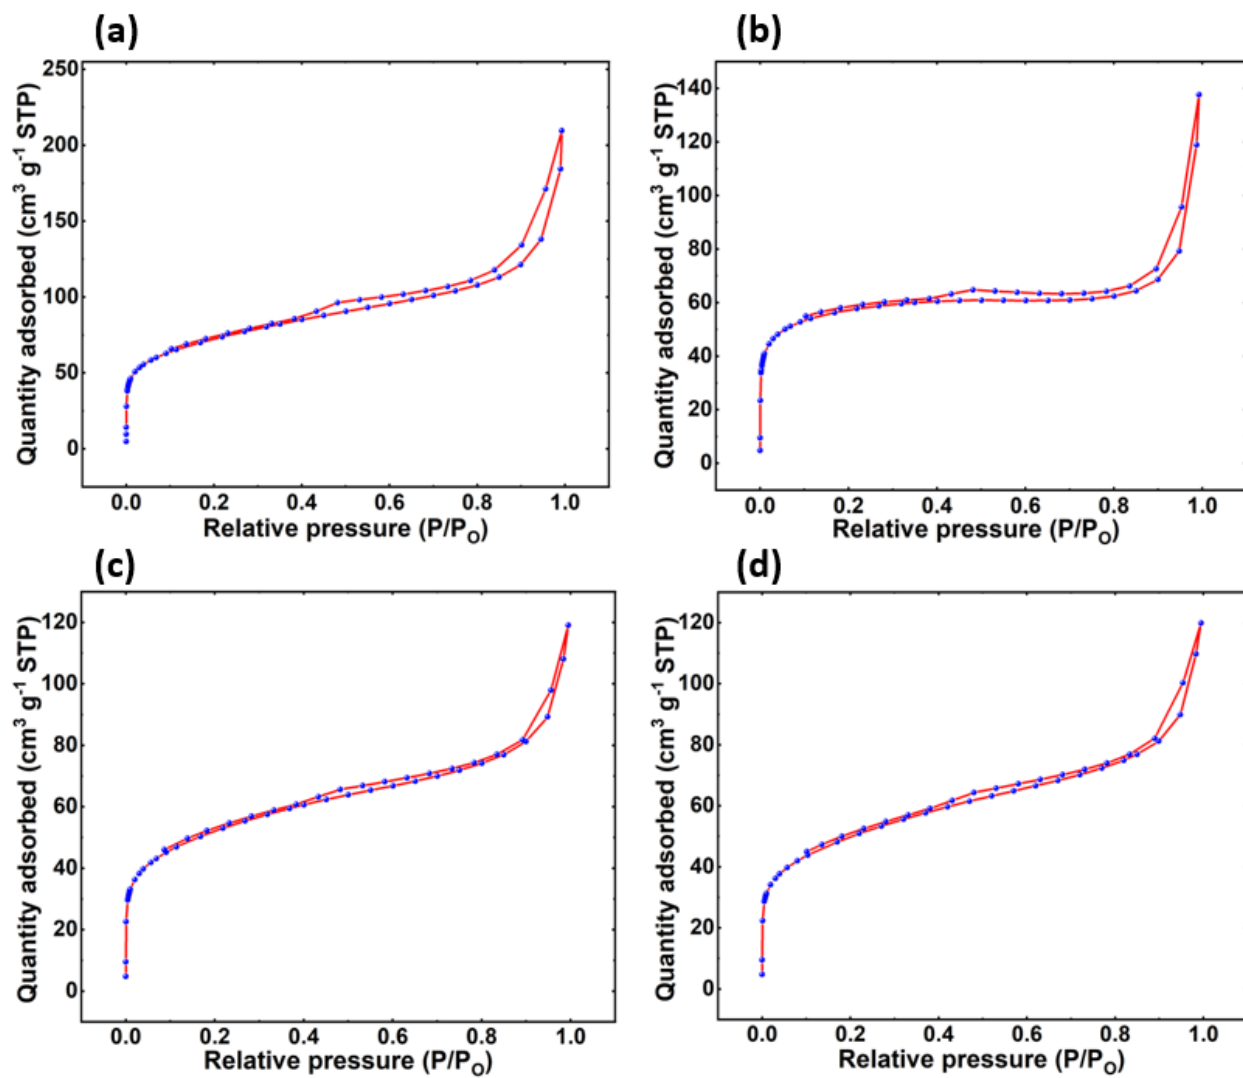

**Figure S2.** Nitrogen adsorption-desorption BET isotherms of (a) CNT-30, (b) CNT-40, (c) CNT-50, and (d) CNT-60 3D CNTs.

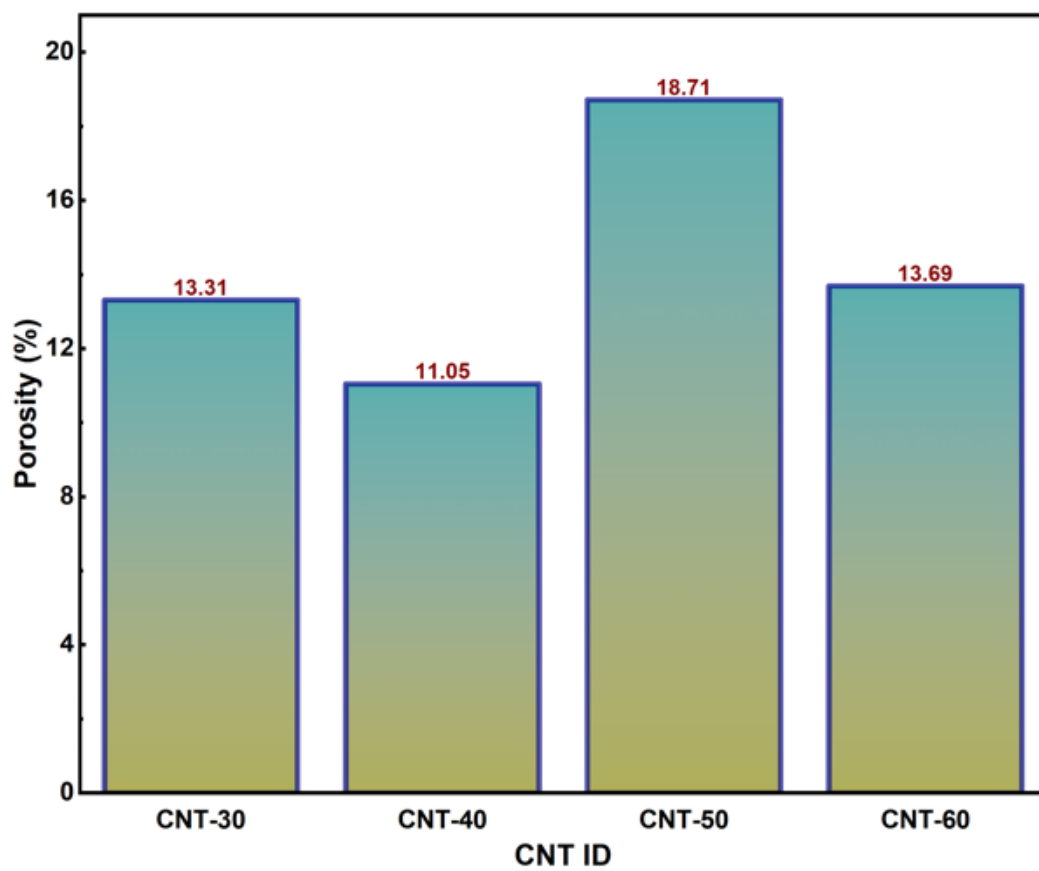

**Figure S3.** Porosities (%) of all four 3D CNTs obtained using t-plot analysis.

**Table S2.** BJH pore size distribution of all four 3D CNTs

| <b>CNT ID</b> | <b>Adsorption<br/>(<math>\text{cm}^3 \text{g}^{-1} \text{nm}^{-1}</math>)</b> | <b>Desorption<br/>(<math>\text{cm}^3 \text{g}^{-1} \text{nm}^{-1}</math>)</b> |
|---------------|-------------------------------------------------------------------------------|-------------------------------------------------------------------------------|
| <b>CNT-30</b> | 0.1595                                                                        | 0.1481                                                                        |
| <b>CNT-40</b> | 0.1413                                                                        | 0.1148                                                                        |
| <b>CNT-50</b> | 0.0848                                                                        | 0.0767                                                                        |
| <b>CNT-60</b> | 0.0897                                                                        | 0.0804                                                                        |

**Table S3.** Calculated diffusion coefficients of lithium-ions for CNT-S-50 based on CV analyses.

| <b>Reaction Type</b>                                                          | <b>Slope</b> | <b>Diffusion coefficient (cm<sup>2</sup> s<sup>-1</sup>)</b> |
|-------------------------------------------------------------------------------|--------------|--------------------------------------------------------------|
| Cathodic (C <sub>1</sub> ): S <sub>8</sub> -Li <sub>2</sub> S <sub>4</sub>    | 0.2577       | 4.60 x 10 <sup>-09</sup>                                     |
| Cathodic (C <sub>2</sub> ): Li <sub>2</sub> S <sub>4</sub> -Li <sub>2</sub> S | 0.4884       | 1.65 x 10 <sup>-08</sup>                                     |
| Anodic (A <sub>1</sub> ): Li <sub>2</sub> S-S <sub>8</sub>                    | 0.5195       | 1.87 x 10 <sup>-08</sup>                                     |
